# Supplementary material
Source: PubMed Central journal article supplement (PMC6447050)

**Figure S1**

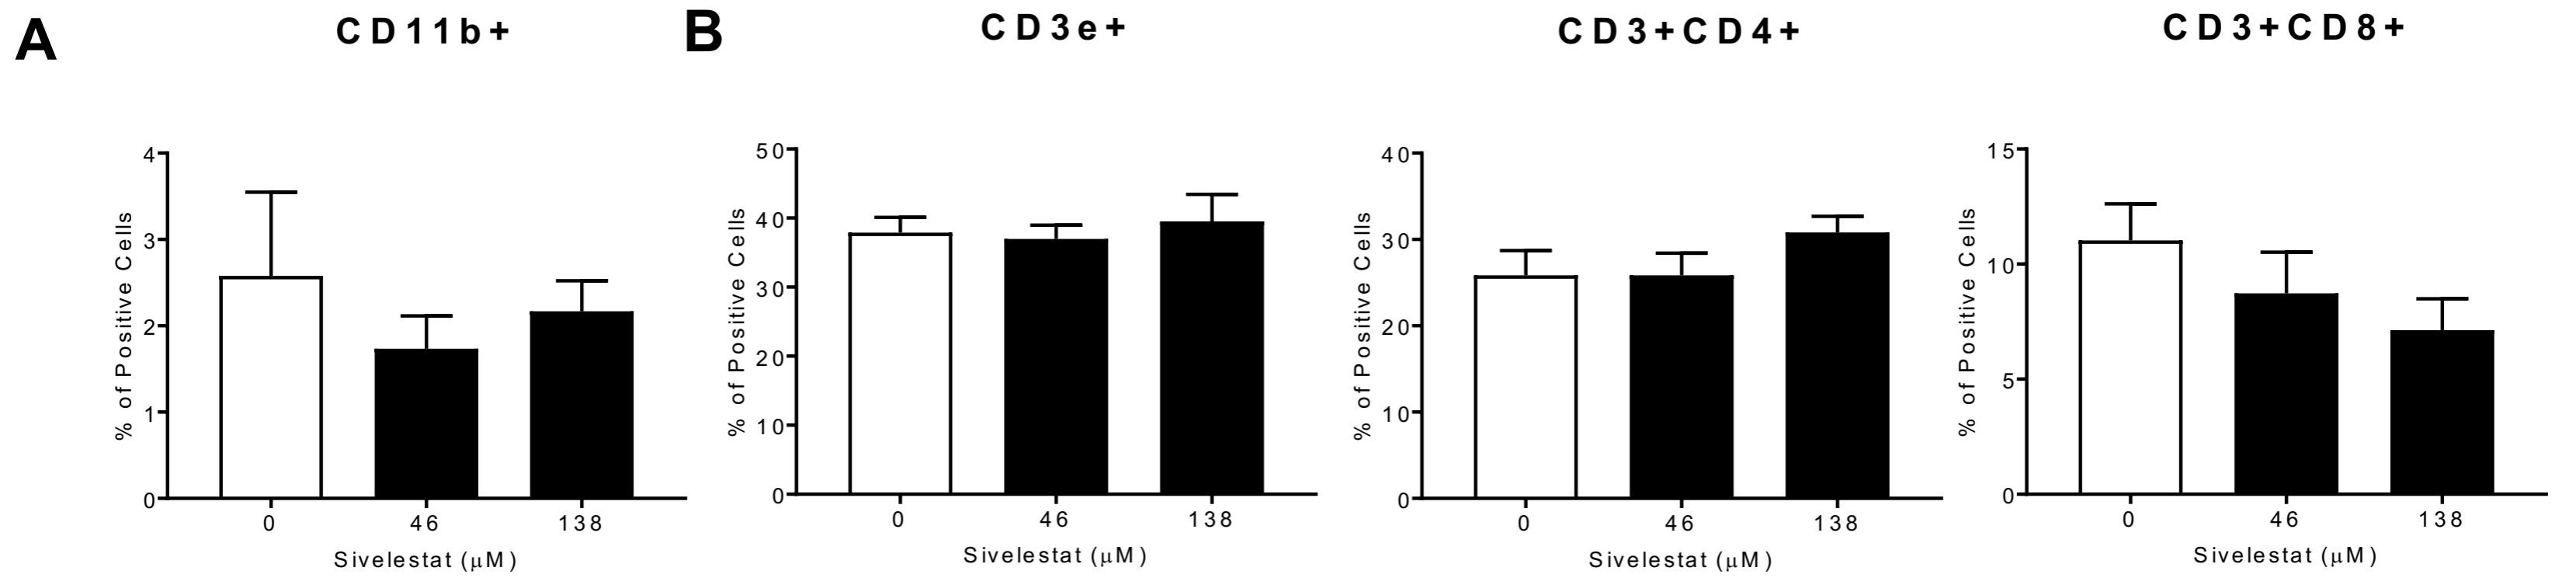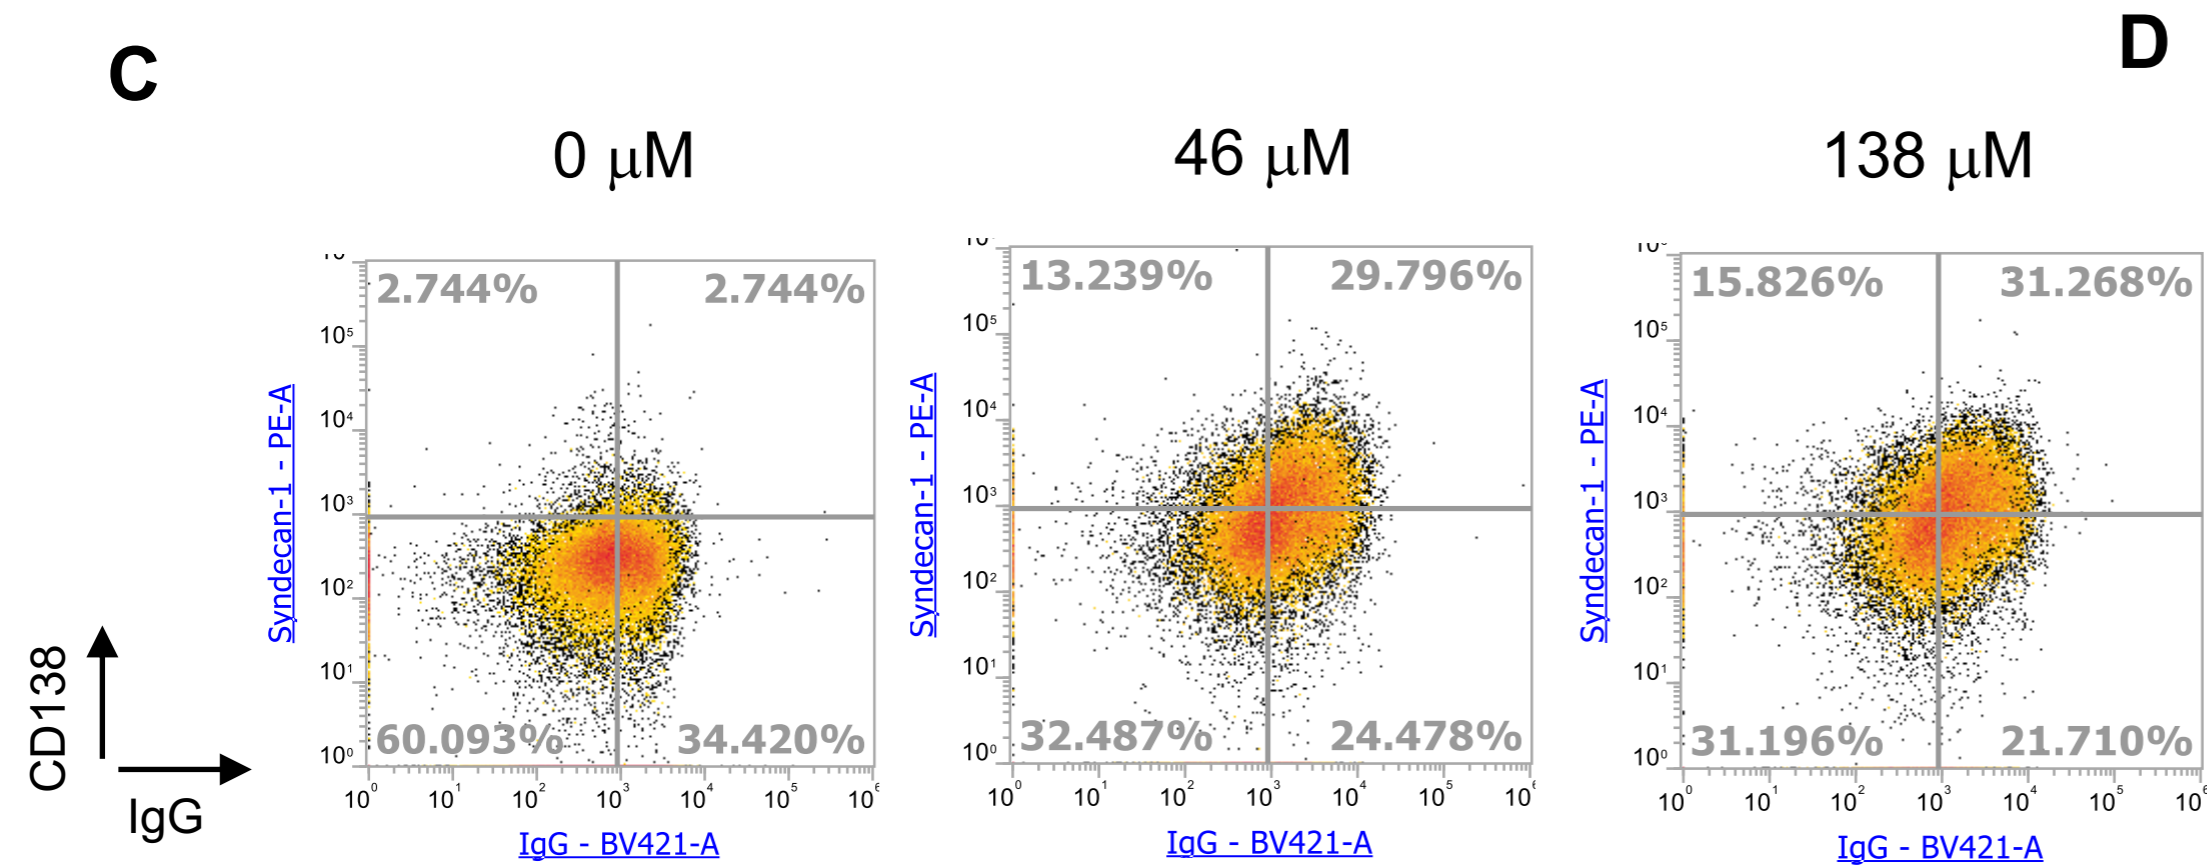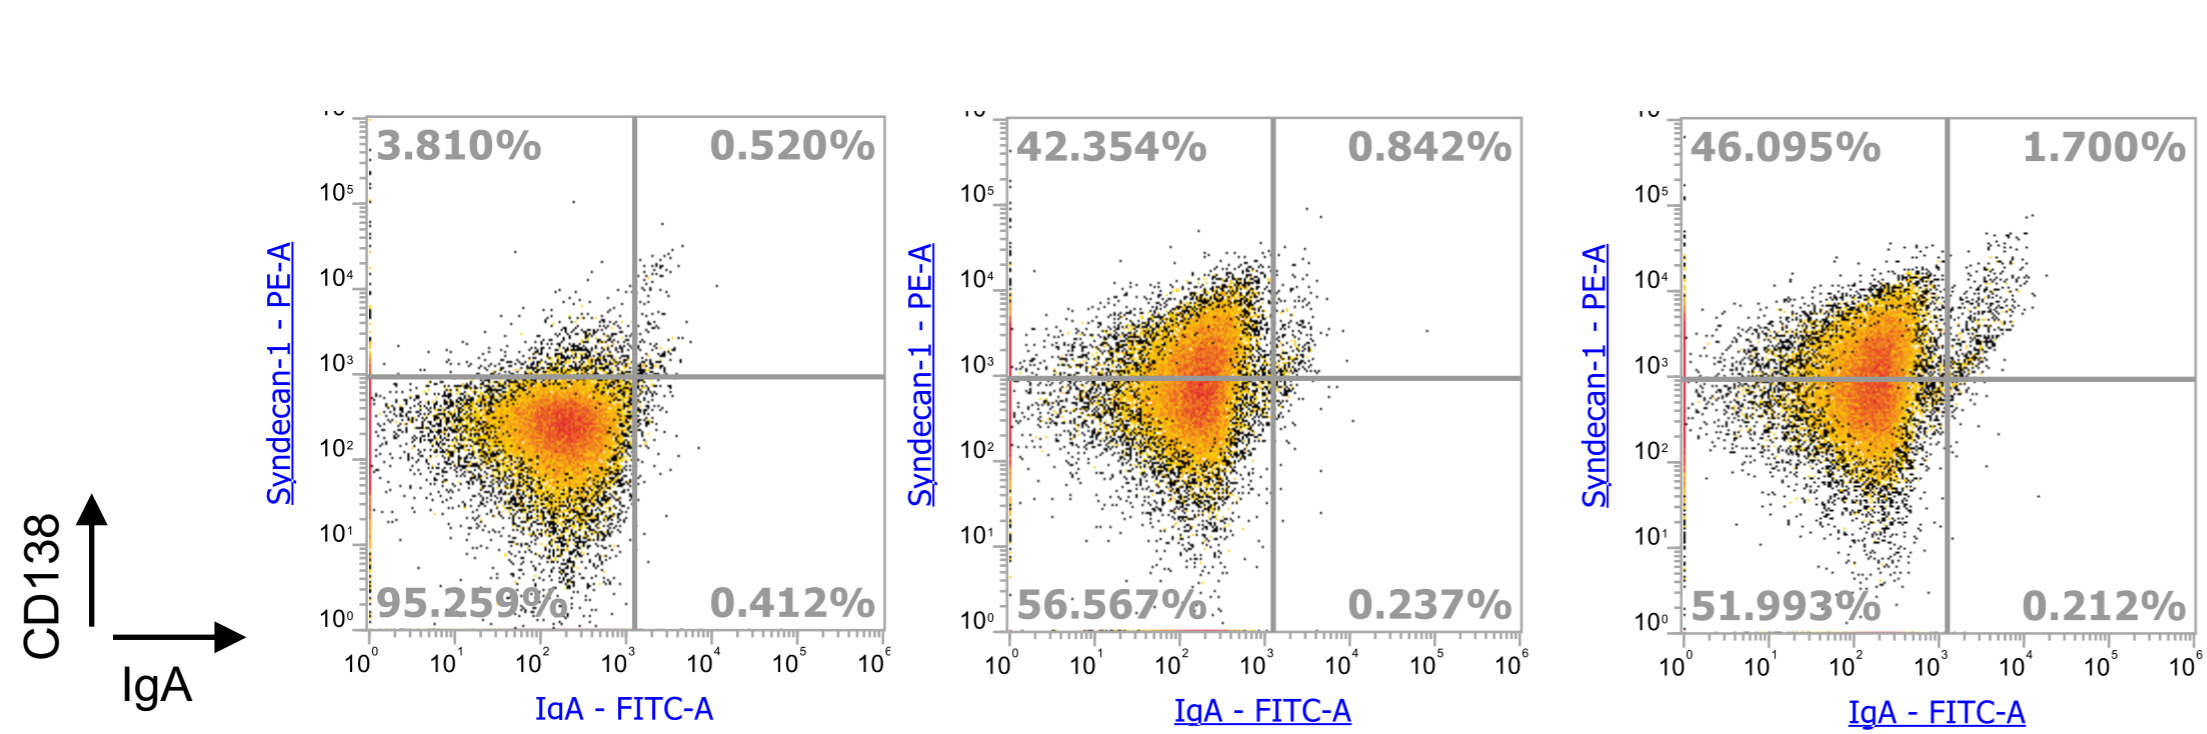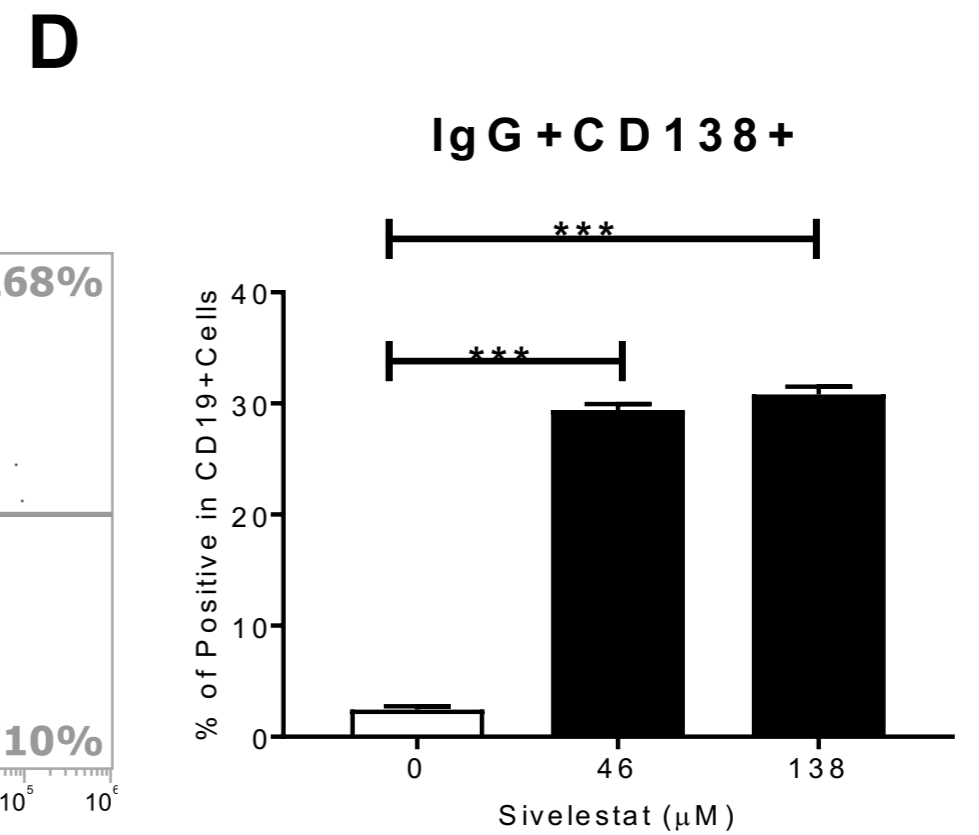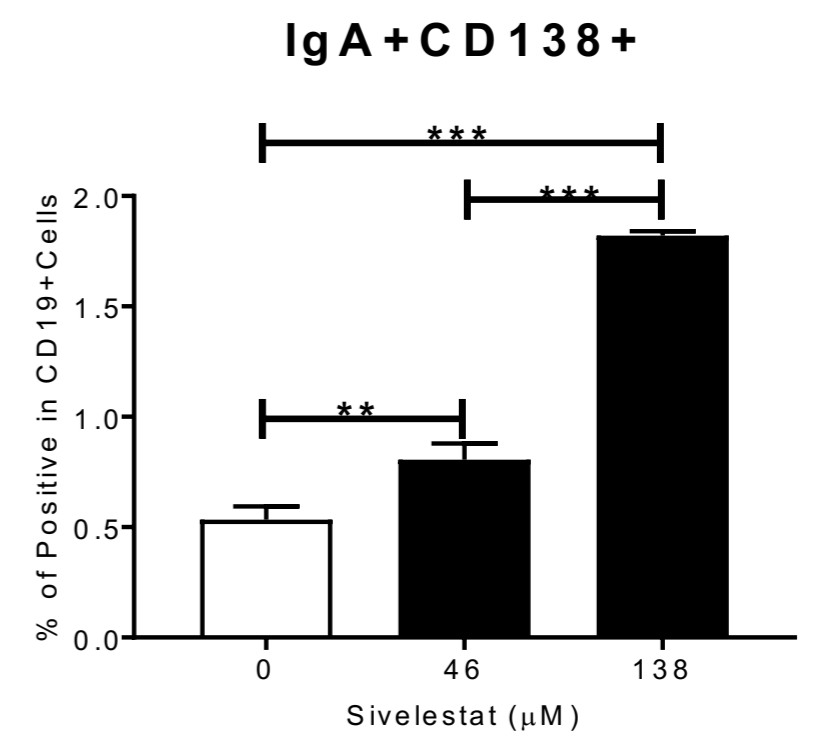

Supplement: NIHMS1511789-supplement-Supplementary_Figure_S1.pdf [file NIHMS1511789-supplement-Supplementary_Figure_S1.pdf]

**Figure S2**

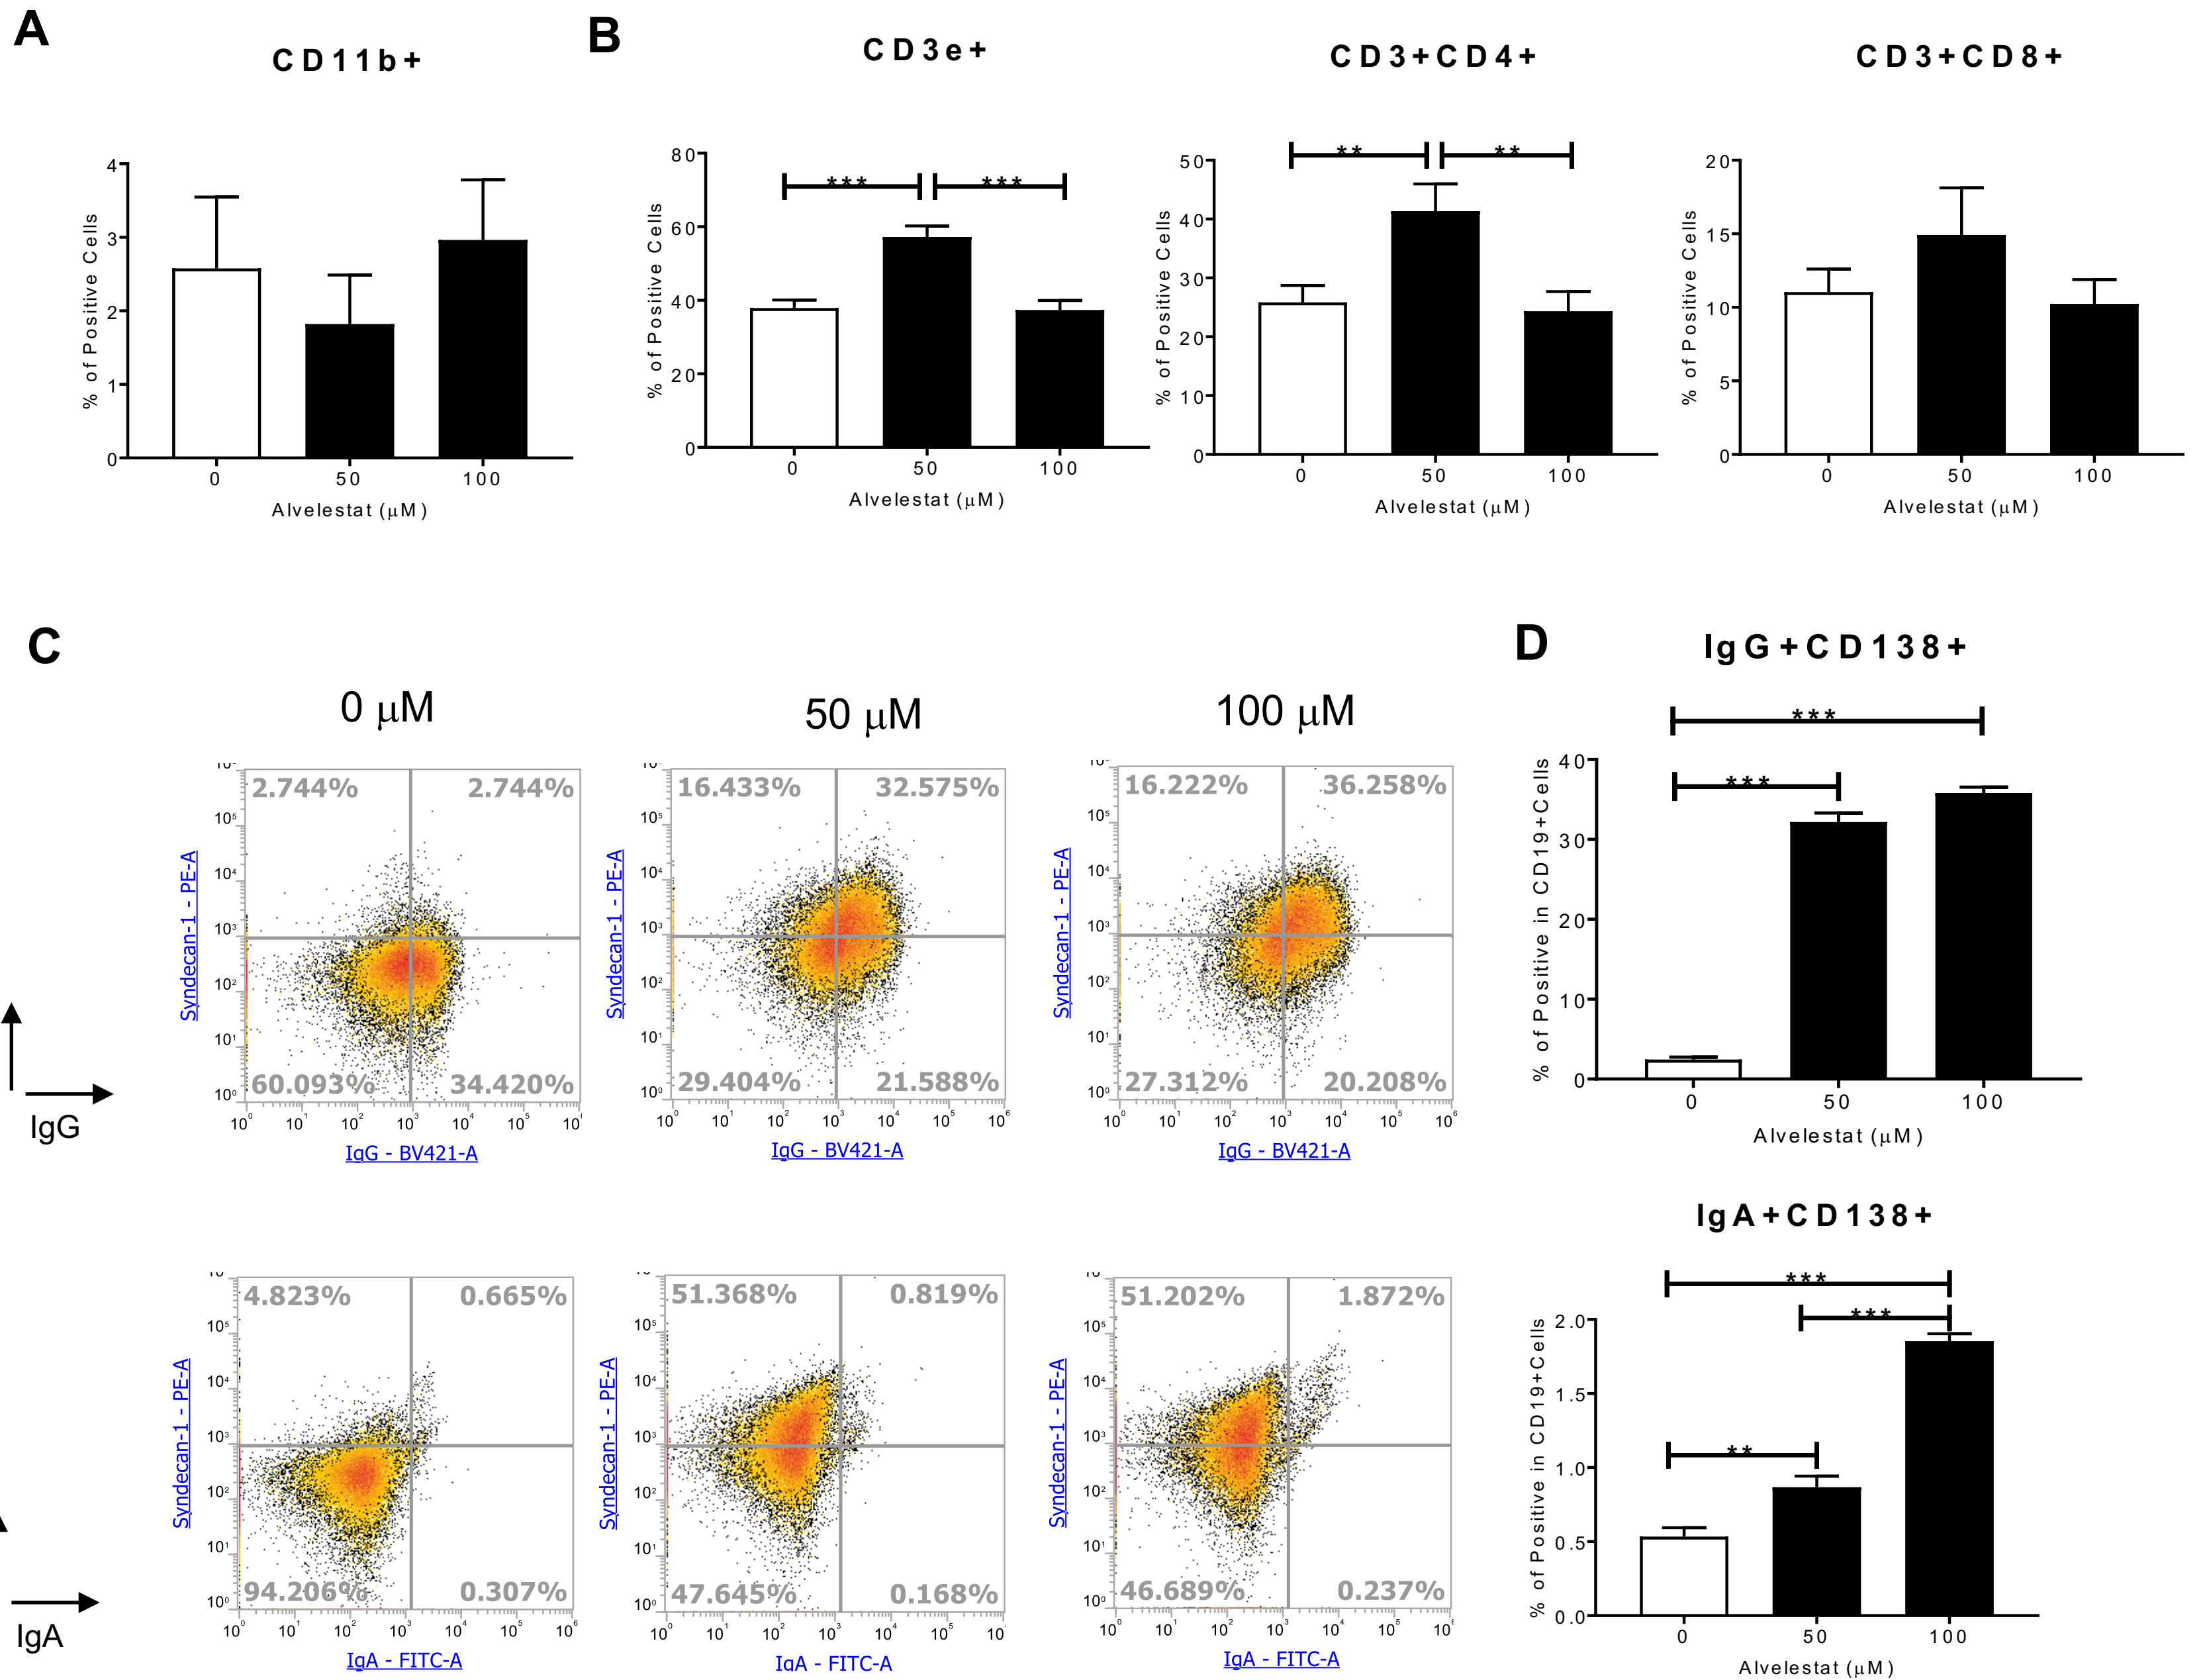

Supplement: NIHMS1511789-supplement-Supplementary_Figure_S2.pdf [file NIHMS1511789-supplement-Supplementary_Figure_S2.pdf]
